# Supplementary material
Source: PubMed Central journal article supplement (PMC4911260)
Supplement: NIHMS753523-supplement-Supplemental_Data_File___doc___tif__pdf__etc__.pdf [file NIHMS753523-supplement-Supplemental_Data_File___doc___tif__pdf__etc__.pdf]

**Supplemental Table 1**

Upregulated Genes

| Probe ID      | Symbol    | Fold  |
|---------------|-----------|-------|
| A_55_P2246235 | Tpm3      | 39.72 |
| A_55_P1960581 | Kdm5b     | 16.31 |
| A_55_P2037328 | Ppp1r12b  | 7.12  |
| A_65_P16483   | Pdzk1     | 6.90  |
| A_51_P460954  | Ccl6      | 6.23  |
| A_55_P2110370 | Olfir116  | 6.02  |
| A_55_P2129373 | Capn11    | 5.76  |
| A_55_P2088348 | Olfir1312 | 5.46  |
| A_55_P1998471 | S100a9    | 5.43  |
| A_51_P312485  | Fpr1      | 5.11  |
| A_55_P2058433 | Cyp2c68   | 5.06  |
| A_52_P677891  | Fam174b   | 4.89  |
| A_55_P2032718 | Kira9     | 4.75  |
| A_52_P288251  | Tmem204   | 4.58  |
| A_51_P390285  | Larp6     | 4.43  |
| A_51_P264634  | Strbp     | 4.30  |
| A_55_P2065144 | Gm5849    | 4.22  |
| A_55_P1956737 | Hsf2bp    | 4.07  |
| A_52_P27012   | Bbs5      | 3.96  |
| A_51_P164835  | Ppl       | 3.80  |
| A_51_P290626  | Gulo      | 3.64  |
| A_51_P489903  | Ogg1      | 3.56  |
| A_55_P2077458 | Mmd       | 3.45  |
| A_66_P127620  | Taar7f    | 3.40  |
| A_55_P2076560 | Nr5a1     | 3.38  |
| A_55_P1994107 | Sema5b    | 3.32  |
| A_52_P319066  | Max3b     | 3.21  |
| A_55_P2097121 | Tmem188   | 3.15  |
| A_51_P169415  | Parvb     | 3.15  |
| A_55_P2157093 | Bcl2l14   | 3.09  |
| A_51_P454166  | Msh3      | 3.03  |
| A_55_P2025340 | Olfir1276 | 2.89  |
| A_55_P2308960 | Fam120c   | 2.85  |
| A_51_P245090  | Aqp3      | 2.80  |
| A_55_P2173199 | Vmn2r4    | 2.79  |
| A_51_P236412  | Cdkl2     | 2.79  |
| A_55_P2008538 | Chmp4b    | 2.67  |
| A_66_P123812  | Olfir168  | 2.67  |
| A_55_P2065751 | Krtap9-2  | 2.66  |
| A_52_P98232   | Hira      | 2.64  |
| A_55_P2076011 | Prss51    | 2.64  |
| A_55_P2107542 | Pde4b     | 2.59  |
| A_52_P353541  | Fbxw13    | 2.56  |
| A_51_P447866  | Sash3     | 2.55  |
| A_55_P2144372 | Mmp24     | 2.52  |
| A_55_P2219243 | Usp43     | 2.51  |
| A_52_P362111  | Fam3c     | 2.50  |
| A_55_P2084617 | Fam78a    | 2.49  |
| A_52_P333825  | Tas2r118  | 2.48  |
| A_51_P330428  | Eif4ebp1  | 2.45  |
| A_51_P301930  | Lrrc17    | 2.41  |
| A_55_P1989171 | Olfir694  | 2.41  |
| A_55_P2182716 | Adig      | 2.40  |
| A_55_P2145759 | Atpv61g3  | 2.39  |
| A_55_P2145637 | Ap1s3     | 2.38  |
| A_52_P475738  | Nln       | 2.37  |
| A_55_P2151817 | Chdh      | 2.35  |
| A_55_P2120089 | Zmynd11   | 2.35  |
| A_51_P115715  | Asb2      | 2.35  |
| A_51_P246428  | Olfir15   | 2.27  |
| A_66_P112919  | Ppyr1     | 2.26  |
| A_52_P366462  | Pyy       | 2.26  |
| A_55_P2101088 | Slc5a11   | 2.26  |
| A_51_P404077  | Fzd2      | 2.25  |
| A_55_P1976430 | Fgf14     | 2.21  |
| A_66_P101935  | Krt6b     | 2.20  |
| A_55_P2121096 | Fbn2      | 2.19  |
| A_52_P320394  | Mrgprtb3  | 2.18  |
| A_55_P1982239 | Ctbf1     | 2.17  |
| A_55_P2174339 | Stam2     | 2.17  |
| A_51_P151020  | Tnp1      | 2.16  |
| A_55_P2037827 | Bmp10     | 2.15  |
| A_55_P2205459 | Hnf1b     | 2.14  |
| A_55_P2007678 | Trpc2     | 2.14  |
| A_55_P2153122 | Zap70     | 2.13  |
| A_52_P9703    | Cyp2a4    | 2.12  |
| A_52_P99810   | Cx3cr1    | 2.11  |
| A_51_P416509  | Hist1h1a  | 2.11  |
| A_51_P166456  | Fzd5      | 2.10  |
| A_51_P138895  | Ccdc102a  | 2.09  |
| A_55_P2007964 | Cx3cr1    | 2.09  |
| A_55_P2091191 | Slc28a2   | 2.09  |
| A_65_P20699   | Tlk2      | 2.08  |
| A_55_P2120254 | Avpi1     | 2.07  |
| A_52_P257426  | Eps8l2    | 2.07  |
| A_55_P2117345 | Fcer2a    | 2.07  |
| A_51_P440985  | Fgf15     | 2.06  |
| A_55_P2021953 | Olfir700  | 2.06  |
| A_55_P2159565 | Tas2r131  | 2.05  |
| A_51_P477229  | Olfir780  | 2.04  |
| A_52_P564413  | Plk3c2g   | 2.03  |
| A_55_P2316783 | Grm5      | 2.02  |
| A_55_P2151284 | Olfir372  | 2.02  |
| A_52_P305230  | Igsf21    | 2.01  |
| A_55_P1953540 | Orly      | 2.01  |
| A_55_P2175502 | DelMm5e   | 2.01  |
| A_52_P85765   | Starb6    | 2.00  |
| A_51_P227962  | Dynlrb2   | 2.00  |

Down-regulated genes

| Probe ID      | Symbol     | Fold |
|---------------|------------|------|
| A_55_P2025840 | Spred2     | 0.15 |
| A_55_P2007986 | Zscan4f    | 0.19 |
| A_55_P2019533 | Zscan4c    | 0.21 |
| A_55_P2003713 | Zscan4e    | 0.21 |
| A_55_P2013843 | Gm2016     | 0.23 |
| A_55_P2029401 | Gm7849     | 0.25 |
| A_55_P2002802 | Usp17i5    | 0.26 |
| A_55_P2082703 | Usp-ps     | 0.27 |
| A_55_P2064486 | Trim58     | 0.27 |
| A_55_P2007017 | Zscan4c    | 0.28 |
| A_55_P2007016 | Zscan4a    | 0.28 |
| A_55_P1995055 | Prr7       | 0.28 |
| A_55_P2074317 | Ap2b1      | 0.29 |
| A_55_P2106798 | Bglap      | 0.29 |
| A_55_P2025103 | Srx3       | 0.34 |
| A_55_P1983380 | Gm2022     | 0.34 |
| A_55_P2103412 | Golt1a     | 0.36 |
| A_52_P506316  | Fbxo8      | 0.36 |
| A_55_P1988043 | Ssh1       | 0.36 |
| A_55_P1965728 | Abca17     | 0.36 |
| A_55_P1973299 | Mapk8      | 0.38 |
| A_55_P2082914 | Acly       | 0.38 |
| A_55_P2055324 | Spint1     | 0.38 |
| A_51_P219100  | Sec63      | 0.39 |
| A_55_P2025954 | Acly       | 0.39 |
| A_55_P2117105 | Ccnj       | 0.39 |
| A_52_P376135  | Mknk2      | 0.40 |
| A_52_P231232  | Nanos1     | 0.40 |
| A_55_P2027731 | Il1r1      | 0.40 |
| A_52_P670978  | Nkain1     | 0.40 |
| A_51_P143040  | Olfir1126  | 0.40 |
| A_55_P2091846 | Zocch11    | 0.40 |
| A_51_P228817  | Stau2      | 0.41 |
| A_51_P111259  | Cdk2ap2    | 0.41 |
| A_55_P2041265 | Utp6       | 0.42 |
| A_52_P200207  | Rmnd5a     | 0.42 |
| A_55_P1956443 | Ttc5       | 0.42 |
| A_55_P2027152 | Ssh1       | 0.42 |
| A_55_P1959858 | Cst10      | 0.43 |
| A_55_P2056719 | AF067061   | 0.44 |
| A_55_P2171912 | Gja3       | 0.44 |
| A_51_P481768  | Tcst1r     | 0.45 |
| A_51_P110672  | Mst1r      | 0.45 |
| A_52_P222350  | Flnb       | 0.45 |
| A_55_P2133027 | Kirrel3    | 0.45 |
| A_55_P2099363 | Stac2      | 0.45 |
| A_52_P410765  | Sema7a     | 0.46 |
| A_55_P2169586 | Ccdc80     | 0.46 |
| A_55_P2061681 | Olfir455   | 0.47 |
| A_55_P2099605 | Ect2       | 0.47 |
| A_51_P480928  | Zhyve16    | 0.48 |
| A_55_P2426884 | DXErt11e   | 0.48 |
| A_66_P102676  | Olfir951   | 0.48 |
| A_52_P15377   | Wnt9b      | 0.48 |
| A_55_P506250  | Olfir441   | 0.48 |
| A_52_P463962  | Krtap16-10 | 0.48 |
| A_51_P242930  | Lat2       | 0.48 |
| A_55_P2141008 | Siglech    | 0.49 |
| A_55_P2131228 | Ttc39a     | 0.49 |
| A_55_P2121613 | Sox4       | 0.49 |
| A_52_P337220  | Mgat4b     | 0.50 |
| A_55_P2113673 | Emil1      | 0.50 |

Fold indicates fold gene induction compared with control siRNA (H1N1-stimulated)

\*Fold\* indicates fold gene induction compared with control siRNA (H1N1-stimulated)
